# Supplementary material for: Efficacy of the PRESERFLO MicroShunt and a Meta-Analysis of the Literature
Source: MDPI journal article supplement (doi:10.3390/jcm11237149), 2022-12-01
Supplement: s1 [file s1]

## Supporting information

### **Efficacy of the PRESERFLO MicroShunt and a Meta-Analysis of the Literature**

#### Contents:

**Table S1:** Summary of the retrieved studies from the systematic review.

**Table S2:** Quality assessment of the included studies according to the Newcastle–Ottawa Scale.

**Figure S1:** Scatterplot showing preoperative and postoperative IOP for PRESERFLO MicroShunt as a standalone procedure and as a cataract-combined procedure.

**Figure S2:** Flowchart showing the selection process for inclusion of studies from our searches according to the PRISMA guidelines.

**Figure S3:** Meta-analysis of the effect of the PRESERFLO MicroShunt on IOP for all specified time intervals.

**Figure S4:** Meta-analysis of the effect of the PRESERFLO MicroShunt on IOP-lowering medication for all specified time intervals.

**Table S1.** Summary of the retrieved studies from the systematic review

|    | STUDY                                 |   | DESIGN                                     | EYES PER GROUP (N) | DIAGNOSIS | INTERVENTION*            | FOLLOW-UP (MONTHS) | IOP REDUCTION MMHG MEAN±SD (%) | NEEDLING (%) | SECONDARY SURGERIES (%) | HYPOTONY (%) | CHOROIDAL DETACHMENT/ EFFUSION (%) |
|----|---------------------------------------|---|--------------------------------------------|--------------------|-----------|--------------------------|--------------------|--------------------------------|--------------|-------------------------|--------------|------------------------------------|
| 1  | Ahmed et al. 2022 [17]                | R | Case series                                | 8                  | POAG      | PRESERFLO+ MMC           | 72                 | (30.7)                         | 63           | NA                      | NA           | NA                                 |
| 2  | Batlle et al. 2016 [18]               | P | Observational study                        | 23                 | POAG      | PRESERFLO+MMC (+CE n=9)  | 36                 | (55)                           | NA           | 4.3                     | 13           | 8.7                                |
| 3  | Beckers et al. 2021 [19]              | P | Single arm Multicenter study               | 81                 | POAG      | PRESERFLO+MMC            | 24                 | 7.8±4.1                        | 6.2          | 6.4                     | 11.1         | NA                                 |
| 4  | Durr et al. 2022 [20]                 | R | Case series                                | 85                 | Glaucoma  | PRESERFLO+MMC            | 12                 | (43.3)                         | 11.8         | 14.1                    | 5.9          | 12.9                               |
| 5  | Baker et al. 2021 [28]                | P | Randomized, Multicenter study              | 395                | POAG      | PRESERFLO+MMC            | 24                 | (29.1)                         | NA           | NA                      | 7.1          | 4.6                                |
| 6  | Barberá et al. 2022 [30]              | R | Single-center, non-randomized              | 64                 | POAG      | PRESERFLO+MMC (+CE=13)   | 9                  | (43.05)                        | 1.6          | 15.6                    | 7.8          | 7.8                                |
| 7  | Saletta et al. 2022 [29]              | R | Chart review                               | 30                 | Glaucoma  | PRESERFLO+MMC            | 12                 | (34.7)                         | 0.1          | 0.1                     | NA           | NA                                 |
| 8  | Tanner et al. 2022 [27]               | R | Multicenter, Cohort study                  | 104                | Glaucoma  | PRESERFLO+MMC            | 12                 | (37.2)                         | 12.5         | 11.5                    | 20.2         | 10.6                               |
| 9  | Fea et al. 2021 [21]                  | R | Open label, Multicenter study              | 104                | Glaucoma  | PRESERFLO+MMC            | 12                 | (43.8)                         | 18.3         | 13.5                    | NA           | 4.8                                |
| 10 | Martinez -de la casa et. Al. 2021 [9] | R | Open label, Multicenter                    | 58                 | Glaucoma  | PRESERFLO+MMC (+CE n=23) | 12                 | (32.1)                         | NA           | NA                      | 1.7          | 3.5                                |
| 11 | Quaranta et al. 2021 [22]             | R | Chart review                               | 31                 | POAG      | PRESERFLO+MMC            | 12                 | (47.9)                         | 19.3         | 3.3                     | 19.3         | 9.6                                |
| 12 | Schlenker et al. 2020 [23]            | R | Single center, Interventional, Case series | 164                | Glaucoma  | PRESERFLO+MMC            | 12                 | (37.9)                         | 8.5          | 1.8                     | 1.2          | 9.2                                |
| 13 | Scheres et al. 2021 [24]              | R | Comparative case series                    | 41                 | POAG      | PRESERFLO+MMC            | 24                 | (39)                           | 5            | 22                      | 39           | 2                                  |
| 14 | Vastardis et al. 2021 [26]            | R | Case series                                | 25                 | POAG      | PRESERFLO+MMC            | 6                  | (49.1)                         | NA           | 4                       | NA           | NA                                 |

\*= between brackets the number of eyes from the total study population that underwent a combined procedure, P=prospective, R=retrospective, CE=cataract extraction, MMC=mitomycin C, POAG=primary open angle glaucoma, SD= standard deviation, glaucoma= mixture of different types of glaucoma, NA=not applicable

**Table S2.** Quality assessment of the included non-randomized studies according to the Newcastle–Ottawa Scale.

|    | <i>Author</i>                        | <i>Selection</i> | <i>Comparability</i> | <i>Outcome<br/>(Cohort)/<br/>Exposure Case<br/>control</i> | <i>Total score<br/>(max. 9)</i> |
|----|--------------------------------------|------------------|----------------------|------------------------------------------------------------|---------------------------------|
| 1  | Ahmed et al. 2022 [17]               | 3                | 2                    | 2                                                          | 7                               |
| 2  | Batlle et al. 2016 [18]              | 3                | 2                    | 3                                                          | 8                               |
| 3  | Beckers et al. 2021 [19]             | 3                | 2                    | 3                                                          | 8                               |
| 4  | Durr et al. 2022 [20]                | 3                | 2                    | 2                                                          | 7                               |
| 5  | Baker et. al 2021 [28]               | 3                | 2                    | 3                                                          | 8                               |
| 6  | Barberá et al 2022 [30]              | 3                | 2                    | 3                                                          | 8                               |
| 7  | Saletta et al. 2022 [29]             | 3                | 2                    | 3                                                          | 8                               |
| 8  | Tanner et al. 2022 [27]              | 3                | 2                    | 3                                                          | 8                               |
| 9  | Fea et al. 2021 [21]                 | 3                | 2                    | 2                                                          | 7                               |
| 10 | Martinez-de la casa et. al. 2021 [9] | 3                | 2                    | 3                                                          | 8                               |
| 11 | Quaranta et al. 2021 [22]            | 3                | 2                    | 2                                                          | 7                               |
| 12 | Schlenker et al. 2020 [23]           | 3                | 2                    | 3                                                          | 8                               |
| 13 | Scheres et al. 2021 [24]             | 3                | 2                    | 3                                                          | 8                               |
| 14 | Vastardis et al. 2021 [26]           | 3                | 2                    | 3                                                          | 8                               |

**Figure S1.** Scatterplot showing preoperative and postoperative IOP for PRESERFLO MicroShunt as a standalone and as a cataract-combined procedure.

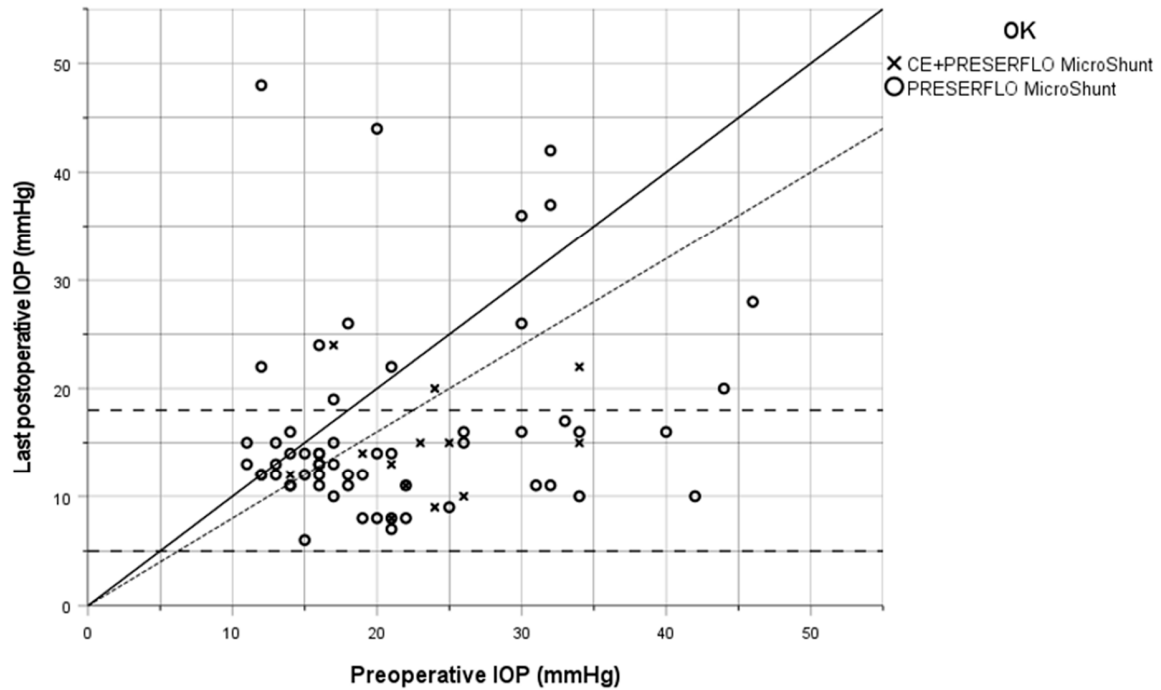

The dotted horizontal lines represent the 5mmHg and 18mmHg IOP-levels and the diagonal dotted line represents the 20% reduction level. IOP=intraocular pressure, CE= cataract extraction, PRESERFLO MicroShunt=standalone procedure, CE+PRESERFLO MicroShunt=combined procedure.

**Figure S2.** Flowchart showing the selection process for the inclusion and exclusion of the searched articles (according to PRISMA). PRISMA = Preferred Reporting Items for Systematic Reviews and Meta-Analyses.

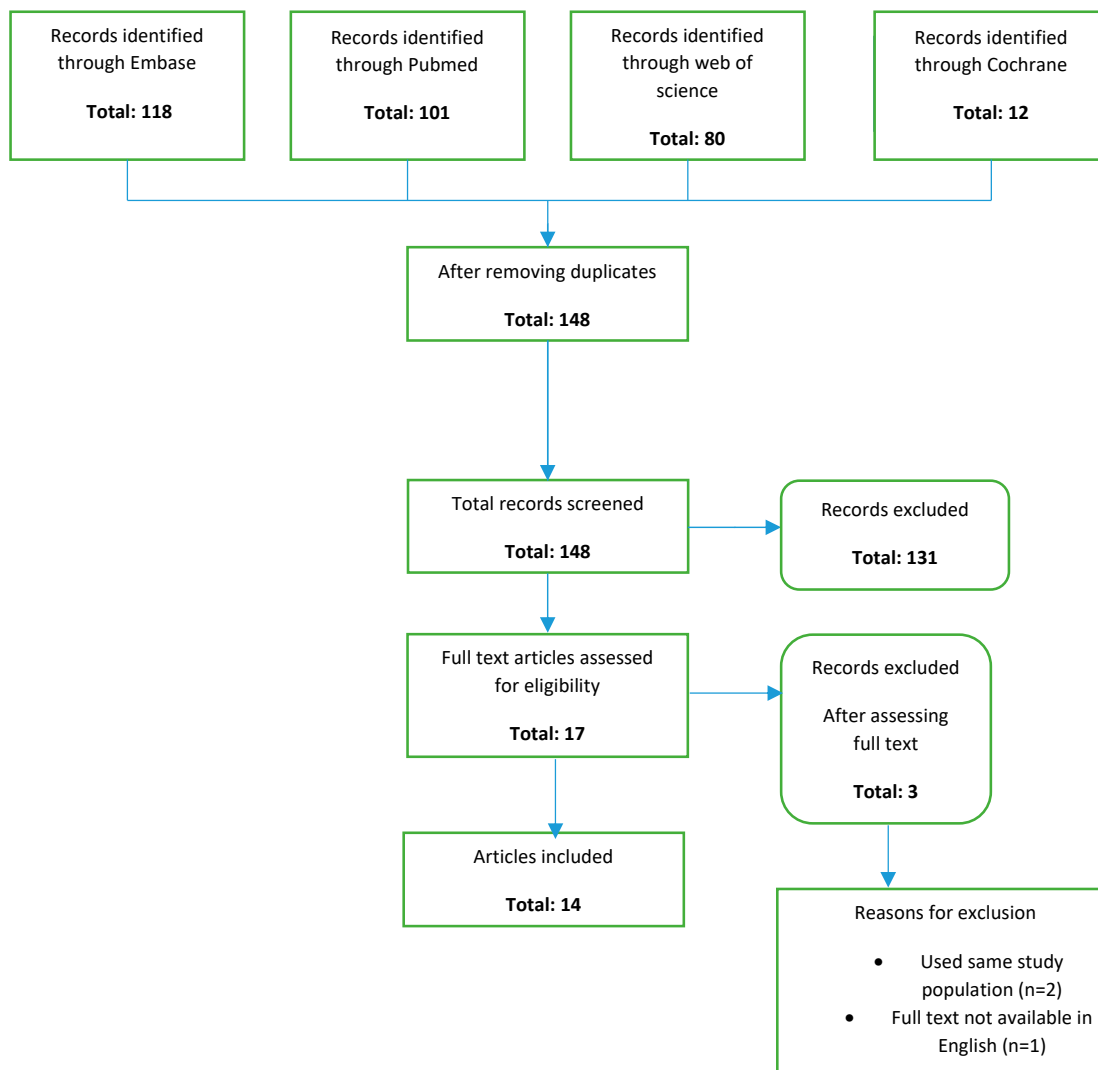

Search strings: **Embase.com** ('innfocus microshunt'/de OR ((styrene/de OR isobutylene/de OR 'poly(styrene block isobutylene block styrene)'/de) AND (glaucoma/exp OR 'glaucoma surgery'/exp OR 'intraocular pressure'/de OR 'glaucoma drainage implant'/de)) OR (Innfocus OR Preserflo OR (Aqueous-Humor NEAR/3 Shunt\*) OR ((SIBS\* OR Styrene-block-IsoButylene\* OR polyIsoButylene\* OR poly-IsoButylene\* OR Styrene-IsoButylene\*) NEAR/10 (glaucoma\* OR subconjunctiv\*-drain\* OR intraocul\* OR intra-ocul\* OR microshunt\* OR micro-shunt\* OR ophthalmol\*)) OR ((subconjunctiv\* OR sub-conjunctiv\*) NEAR/3 ab-externo NEAR/3 glaucoma) OR ((microshunt\* OR micro-shunt\*) NEAR/3 (ab-externo\*)):ab,ti). **Medline All Ovid (Pubmed)** (((Styrene/ OR Styrenes/) AND (exp Glaucoma/ OR Intraocular Pressure/ OR Glaucoma Drainage Implants/)) OR (Innfocus OR Preserflo OR (Aqueous-Humor ADJ3 Shunt\*) OR ((SIBS\* OR Styrene-block-IsoButylene\* OR polyIsoButylene\* OR poly-IsoButylene\* OR Styrene-IsoButylene\*) ADJ10 (glaucoma\* OR subconjunctiv\*-drain\* OR intraocul\* OR intra-ocul\* OR microshunt\* OR micro-shunt\* OR ophthalmol\*)) OR ((subconjunctiv\* OR sub-conjunctiv\*) ADJ3 ab-externo ADJ3 glaucoma) OR ((microshunt\* OR micro-shunt\*) ADJ3 (ab-externo\*)):ab,ti.) **Web of science (SCI-EXPANDED & SSCI, 1975-)** TS=(Innfocus OR Preserflo OR (Aqueous-Humor NEAR/2 Shunt\*) OR ((SIBS\* OR Styrene-block-IsoButylene\* OR polyIsoButylene\* OR poly-IsoButylene\* OR Styrene-IsoButylene\*) NEAR/10 (glaucoma\* OR subconjunctiv\*-drain\* OR intraocul\* OR intra-ocul\* OR microshunt\* OR micro-shunt\* OR ophthalmol\*)) OR ((subconjunctiv\* OR sub-conjunctiv\*) NEAR/2 ab-externo NEAR/2 glaucoma) OR ((microshunt\* OR micro-shunt\*) NEAR/2 (ab-externo\*))) **Cochrane Central Register of Controlled Trials** ((Innfocus OR Preserflo OR (Aqueous NEXT Humor NEAR/3 Shunt\*) OR ((SIBS\* OR Styrene NEXT block NEXT IsoButylene\* OR polyIsoButylene\* OR poly NEXT IsoButylene\* OR Styrene NEXT IsoButylene\*) NEAR/10 (glaucoma\* OR subconjunctiv\* NEXT drain\* OR intraocul\* OR intra NEXT ocul\* OR microshunt\* OR micro NEXT shunt\* OR ophthalmol\*)) OR ((subconjunctiv\* OR sub NEXT conjunctiv\*) NEAR/3 ab NEXT externo NEAR/3 glaucoma) OR ((microshunt\* OR micro NEXT shunt\*) NEAR/3 (ab NEXT externo\*)):ab,ti)

**Figure S3.** Meta-analyses for the effect of the PRESERFLO MicroShunt on IOP for all specified time intervals.\*

(A)

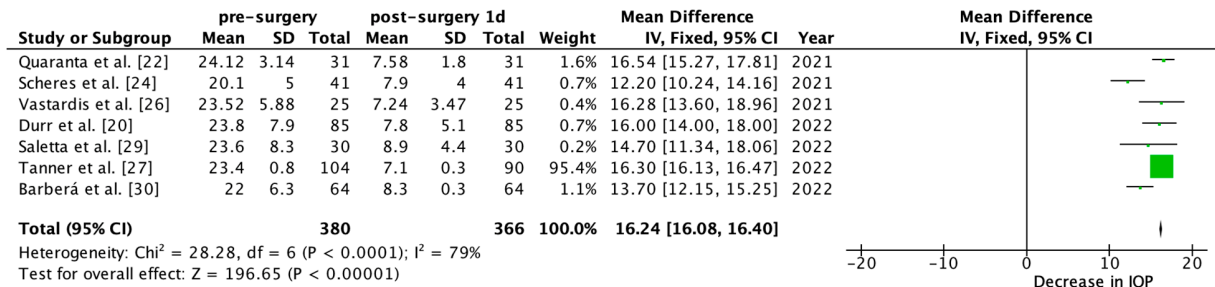

(B)

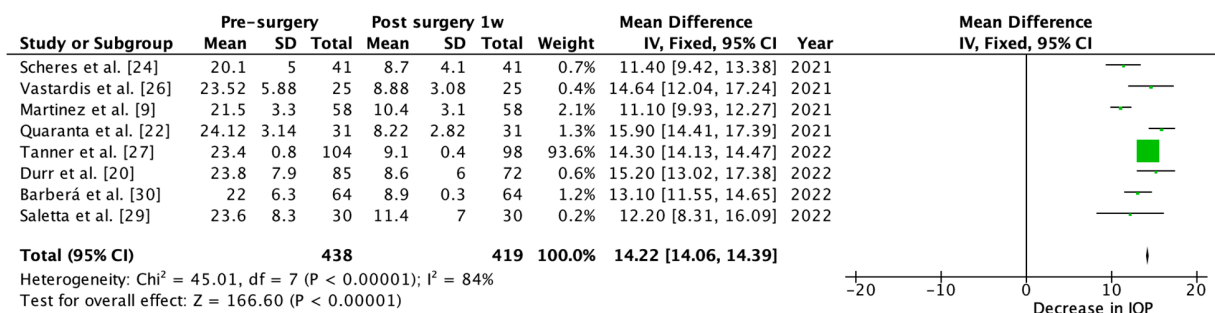

(C)

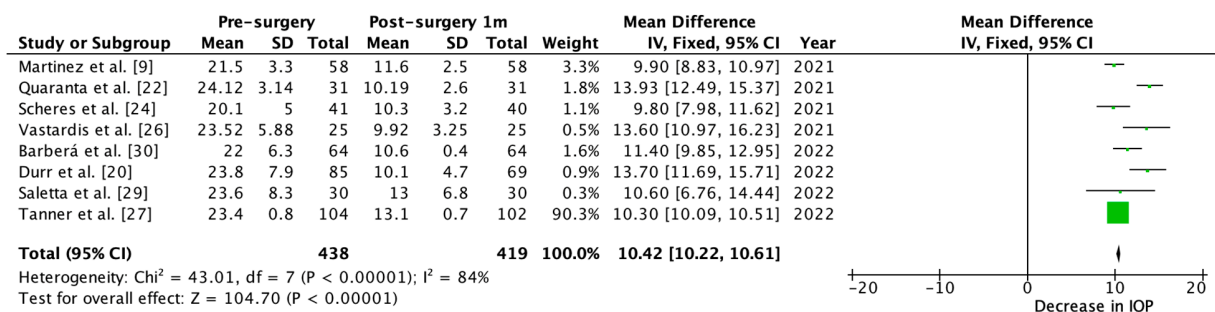

(D)

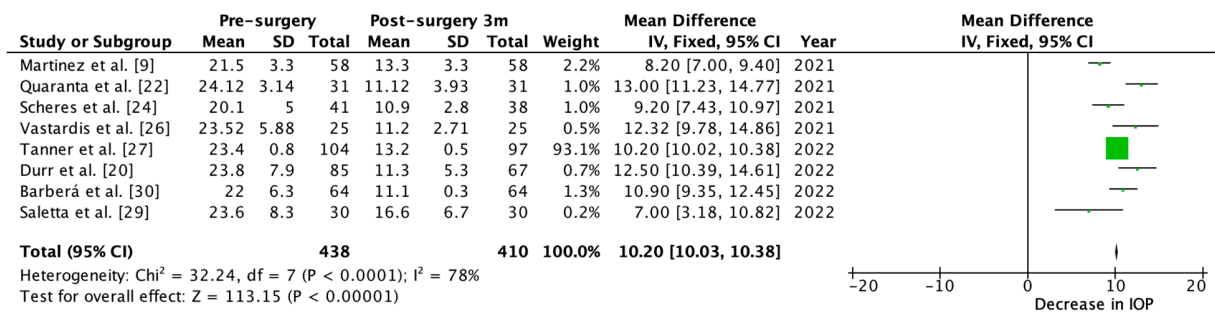

(E)

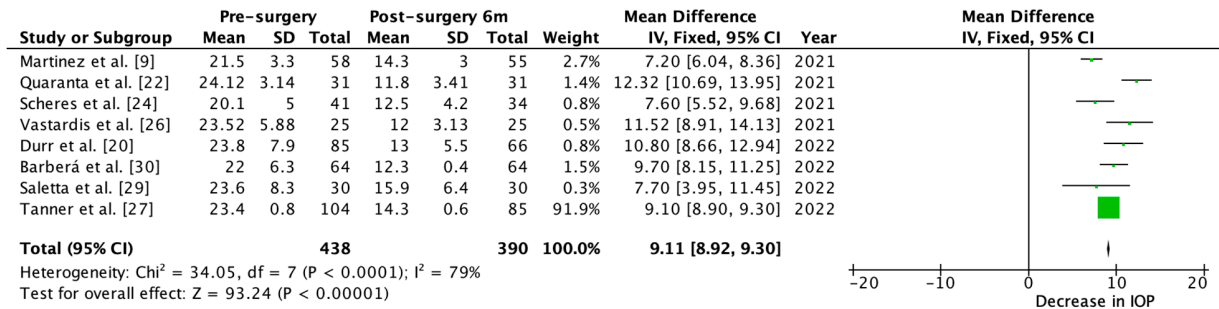

(F)

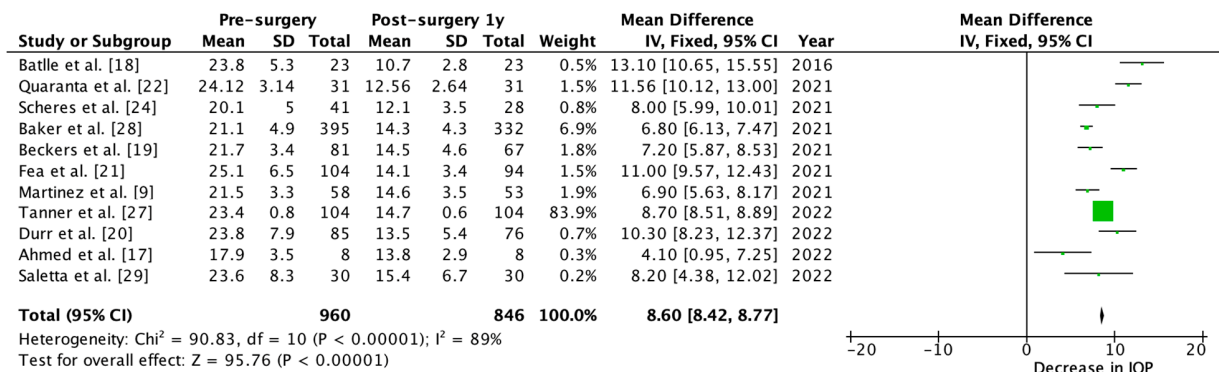

(H)

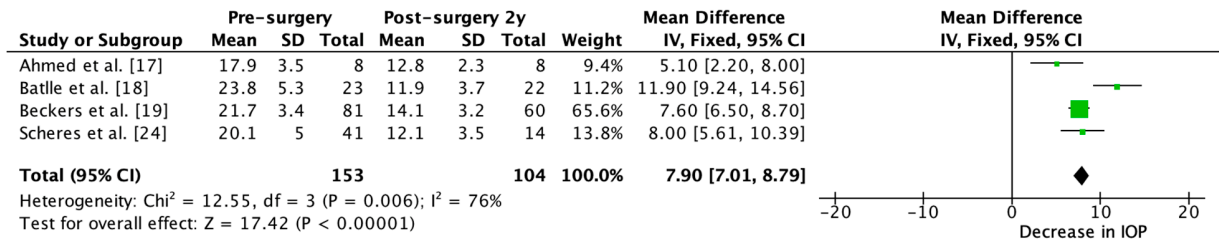

(I)

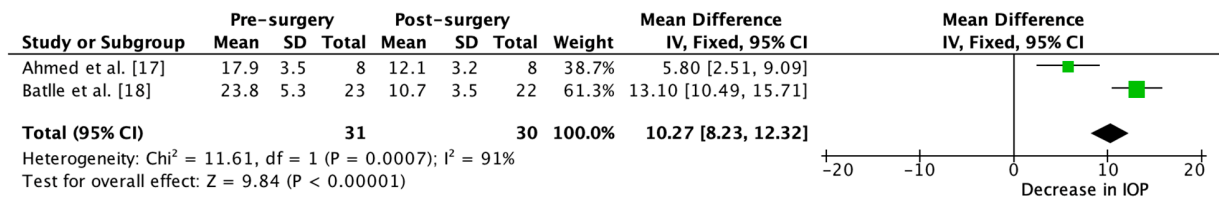

\* = Presented as the mean decrease in IOP at 1 day (A), 1 week (B), 1month (C), 3 months (D), 6 months (E), 1 year (F), 2 years (G) and 3 years (H) follow-up. Black diamonds indicate the overall weighted mean difference (WMD). The size of the green box is inversely proportional to the variance. Horizontal lines indicate the 95% confidence interval (CI). The dashed vertical line in each panel shows the value for no effect (WMD = 0) compared to pre-surgery IOP. IOP = intraocular pressure; CI = confidence interval; SD = standard deviation; IV = inverse variance, WMD = weighted mean difference.

**Figure S4.** Meta-analysis for the effect of the PRESERFLO MicroShunt on IOP-lowering medication for all specified time-intervals.\*

(A)

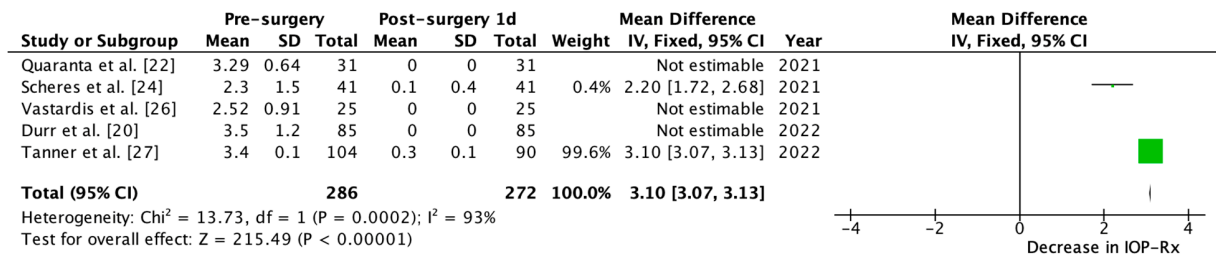

(B)

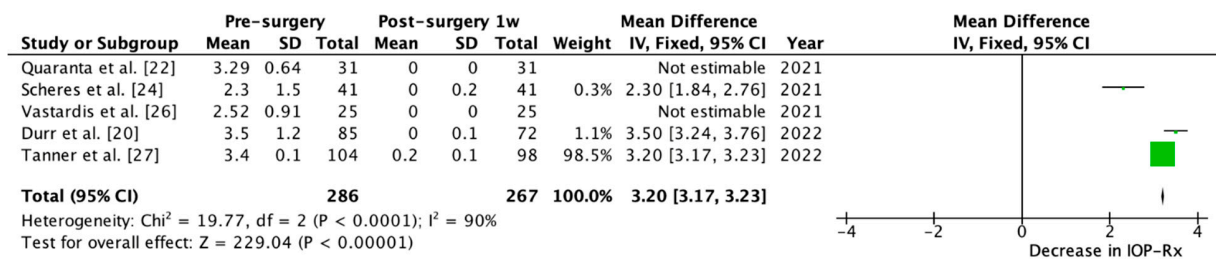

(C)

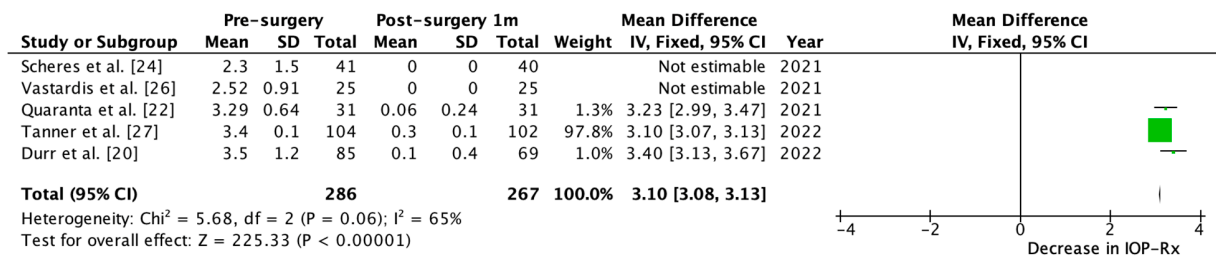

(D)

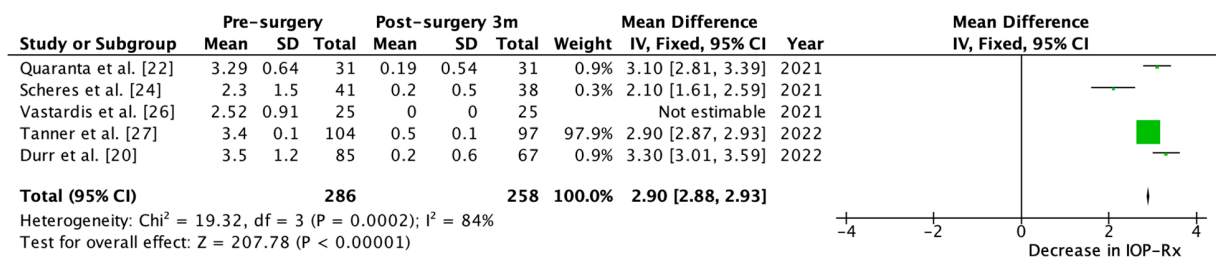



(E)

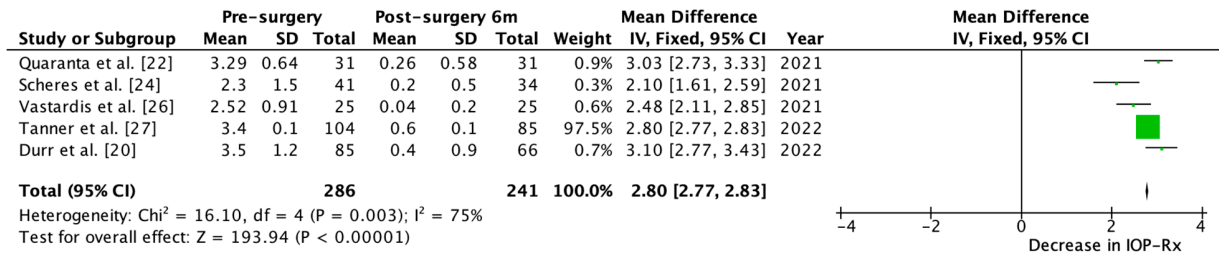

(F)

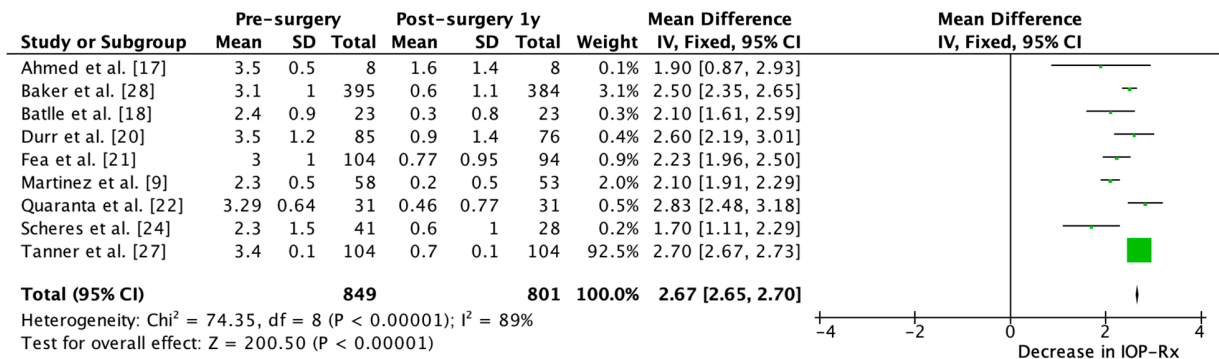

(G)

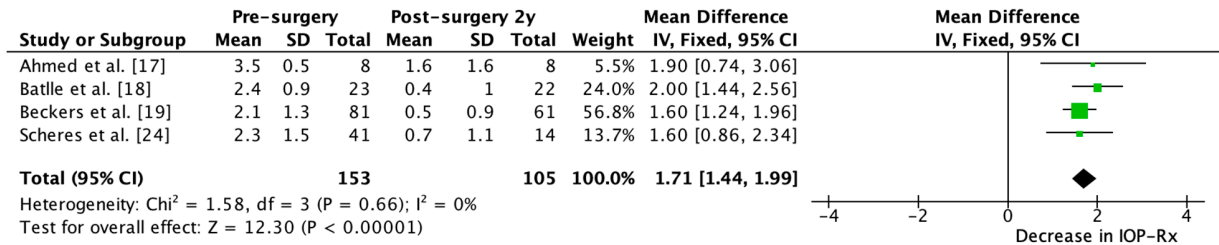

(H)

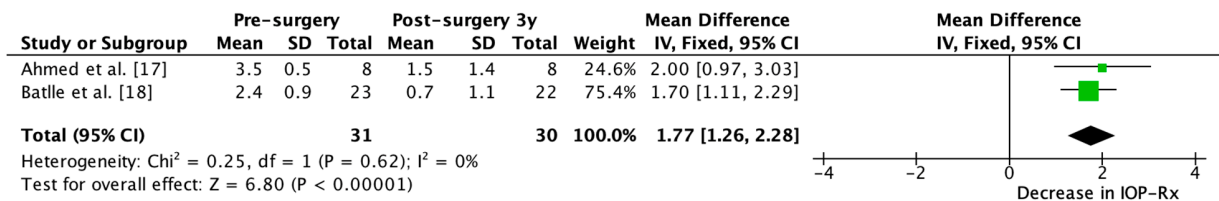

\* = Presented as the mean decrease in IOP-lowering medication at 1 day (A), 1 week (B), 1 month (C), 3 months (D), 6 months (E), 1 year (F), 2 years (G), 3 years (H) of follow-up. Black diamonds indicate the overall weighted mean difference (WMD). The size of the green box is inversely proportional to the variance. Horizontal lines indicate 95% confidence interval (CI). The dashed vertical line in each panel shows the value for no effect (WMD = 0) compared to pre-surgery IOP-lowering medications. IOP = intraocular pressure; CI = confidence interval; SD = standard deviation; IV = inverse variance, WMD = weighted mean difference
